# Supplementary material
Source: PubMed Central journal article supplement (PMC2757986)
Supplement: supp_M109.043208_jbc.M109.043208-1.pdf [file supp_M109.043208_jbc.M109.043208-1.pdf]

## Investigating the Elusive Mechanism of Glycosaminoglycan Biosynthesis

Xylophone V. Victor<sup>1</sup>, Thao K. N. Nguyen<sup>2</sup>, Manivannan Ethirajan<sup>1</sup>, Vy M. Tran<sup>2</sup>, Khiem V. Nguyen<sup>1</sup> and Balagurunathan Kuberan<sup>1,2\*</sup>

<sup>1</sup>Department of Medicinal Chemistry and <sup>2</sup>Department of Bioengineering,  
University of Utah, Salt Lake City, UT 84112

### Supplemental Section:

#### Structural data:

For xylosides 1 through 25, the structural data can be found in the following reference B.

Kuberan et. al., (2008) *Chembiochem*, **9**, 198-200. The data for remaining xylosides are provided below.

**Xyloside 26:** 1H NMR (CD<sub>3</sub>OD):  $\delta$  8.436 (1H, s, triazolyl H), 8.111 (1H, d, J = 7.815, Ar-H), 7.346 (1H, dd, J = 7.03, 8.55 Hz, Ar-H), 7.109 (1H, d, J = 8.2 Hz, Ar-H), 7.055 (1H, dd, J = 7.42, 8.59 Hz, Ar-H), 5.556 (1H, d, J = 9.38 Hz, H-1), 4.057-4.004 (2H, m, H-2, H-5a), 3.962 (3H, s), 3.745-3.682 (1H, m, H-4), 3.540-3.468 (2H, m, H-3, H-5b); Mass (EI): calculated for C<sub>14</sub>H<sub>17</sub>N<sub>3</sub>O<sub>5</sub>+H 308.12465, found 307.9333

**Xyloside 27:** 1H NMR (CD<sub>3</sub>OD):  $\delta$  8.408 (1H, s, triazolyl H), 7.754 (2H, d, J = 8.99 Hz, Ar-H), 6.993 (2H, d, J = 8.98 Hz, Ar-H), 5.533 (1H, d, J = 9.37 Hz, H-1), 4.033 (1H, dd, J = 5.47, 11.33 Hz, H-5a), 3.937 (1H, d, J = 9.37 Hz, H-2), 3.824 (3H, s), 3.735-3.673 (1H, m, H-4), 3.574-3.464 (2H, m, H-3, H-5b); Mass (EI): calculated for C<sub>14</sub>H<sub>17</sub>N<sub>3</sub>O<sub>5</sub> +H 308.12465, found 308.0667

**Xyloside 28:** 1H NMR (CD<sub>3</sub>OD):  $\delta$  8.544 (1H, s, triazolyl H), 7.022 (2H, d, J = 2.34 Hz, Ar-H), 6.477 (1H, t, J = 2.34 Hz, Ar-H), 5.540 (1H, d, J = 9.37 Hz, H-1), 4.034 (1H, dd, J = 5.47, 11.33 Hz, H-5a), 3.937 (1H, d, J = 9.37 Hz, H-2), 3.824 (6H, s), 3.709-3.669 (1H, m, H-4), 3.541-3.465 (2H, m, H-3, H-5b); Mass (EI): calculated for C<sub>15</sub>H<sub>19</sub>N<sub>3</sub>O<sub>6</sub> +H 338.13521, found 338.0000

**Xyloside 29:** 1H NMR (CD<sub>3</sub>OD):  $\delta$  8.871 (1H, s, triazolyl H), 8.470 (2H, s, Ar-H), 7.949 (1H, s, Ar-H), 5.591 (1H, d, J = 9.38 Hz, H-1), 4.051 (1H, dd, J = 5.47, 11.32 Hz, H-5a), 3.937 (1H, d, J

= 9.38 Hz, H-2), 3.740-3.677 (1H, m, H-4), 3.554-3.482 (2H, m, H-3, H-5b); Mass (EI):

calculated for  $C_{15}H_{13}F_6N_3O_4 + H$  414.08885, found 413.9333

**Xyloside 30:**  $^1H$  NMR ( $CD_3OD$ ):  $\delta$  8.50 (1H, s, triazolyl H), 8.25 (1H, dd,  $J = 3.51, 6.25$  Hz, Ar-H), 7.93-7.95 (2H, m, Ar-H), 7.70 (1H, dd,  $J = 1.1, 7.0$  Hz, Ar-H), 7.52-7.57 (3H, m, Ar-H), 5.64 (1H, d,  $J = 9.3$  Hz, H-1), 4.07 (1H, dd,  $J = 5.47, 11.13$  Hz, H-5a), 4.03 (1H, t,  $J$

= 9.37, H-2), 3.71-3.77 (1H, m, H-4), 3.51-3.58 (2H, m, H-3, H-5b); Mass (EI): calculated

for  $C_{17}H_{17}N_3O_4 + H$  328.12, found 327.93

## Figure Legends

**Figure S1. Calibration of size exclusion column with polystyrene sulfonate standards.** Polystyrene sulfonate standards of various molecular weights, 65000 Da, were analyzed by size exclusion chromatography as described in the “Material and Methods” section. The migration times of the various polystyrene sulfonate species were plotted against the molecular weight to obtain a calibration curve. The migration time of GAG chains primed by various xylosides were compared to the calibration curve to determine the molecular weight.

**Figure S2. Chain length analysis of xyloside-primed GAG chains.** The molecular weight of the GAG chains synthesized on various primers was determined by measuring their migration time on size exclusion column as described in the “Material and Methods” section.  $V_0$  and  $V_t$  represent the void volume and total volume, respectively. The average migration time was determined by using peak width at half maximum. The average molecular weight was determined using the migration time in comparison to the calibration curve obtained for polystyrene sulfonate standards performed under similar conditions.

**Figure S3. Disaccharide profiles of xyloside-primed HS chains.** GAG chains (~500,000 cpm) were digested with heparitinases and resulting disaccharides were analyzed by SAX-HPLC with inline flow scintillation analyzer as described in the Experimental section. The SAX elution chromatograms of representative of two independent experiments. I:  $\Delta$ UA-GlcNAc; II:  $\Delta$ UA-GlcNS; III:  $\Delta$ UA-GlcNS6S; IV:  $\Delta$ UA2S-GlcNS; V:  $\Delta$ UA2S-GlcNAc6S and IV:  $\Delta$ UA2S-GlcNS6S.

**Figure S4. Disaccharide profiles of xyloside-primed DS chains.** GAG chains (~500,000 cpm) were digested with chondroitinase ABC enzyme and resulting disaccharides were analyzed by SAX-HPLC with inline flow scintillation analyzer as described in the Experimental section. The SAX elution chromatograms of representative of two independent experiments. I:  $\Delta$ UA-GalNAc; and II:  $\Delta$ UA-GalNAc6S.

**Figure S5. Disaccharide profiles of xyloside-primed CS chains.** GAG chains (~500,000 cpm) were digested with chondroitinase ABC enzyme and resulting disaccharides were analyzed by SAX-HPLC with inline flow scintillation analyzer as described in the Experimental section. The SAX elution chromatograms of representative of two independent experiments. I:  $\Delta$ UA-GalNAc; and II:  $\Delta$ UA-GalNAc6S.

**Figure S6. Long term priming ability of GAG chains by xyloside.** The long term priming ability of click-xyloside was examined using xylosyl transferase deficient CHO cells (pgsA-745). 100,000 cells were seeded per well of 24-well plates and treated with xyloside **5** at 100  $\mu$ M concentration in the presence of 50  $\mu$ Ci  $^{35}$ S-SO<sub>4</sub><sup>2-</sup> or D-[6-<sup>3</sup>H]-glucosamine. The medium was removed from the well at 24, 48, 96 and 120 h, GAG chains were purified and quantified as described under “Experimental Methods”.

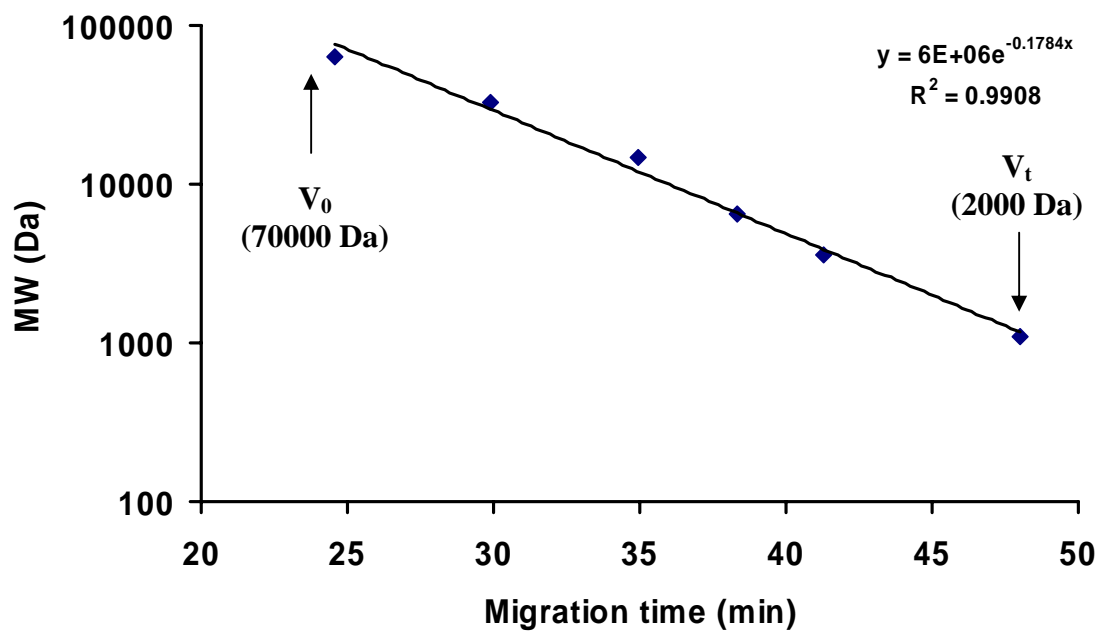

FIGURE S1

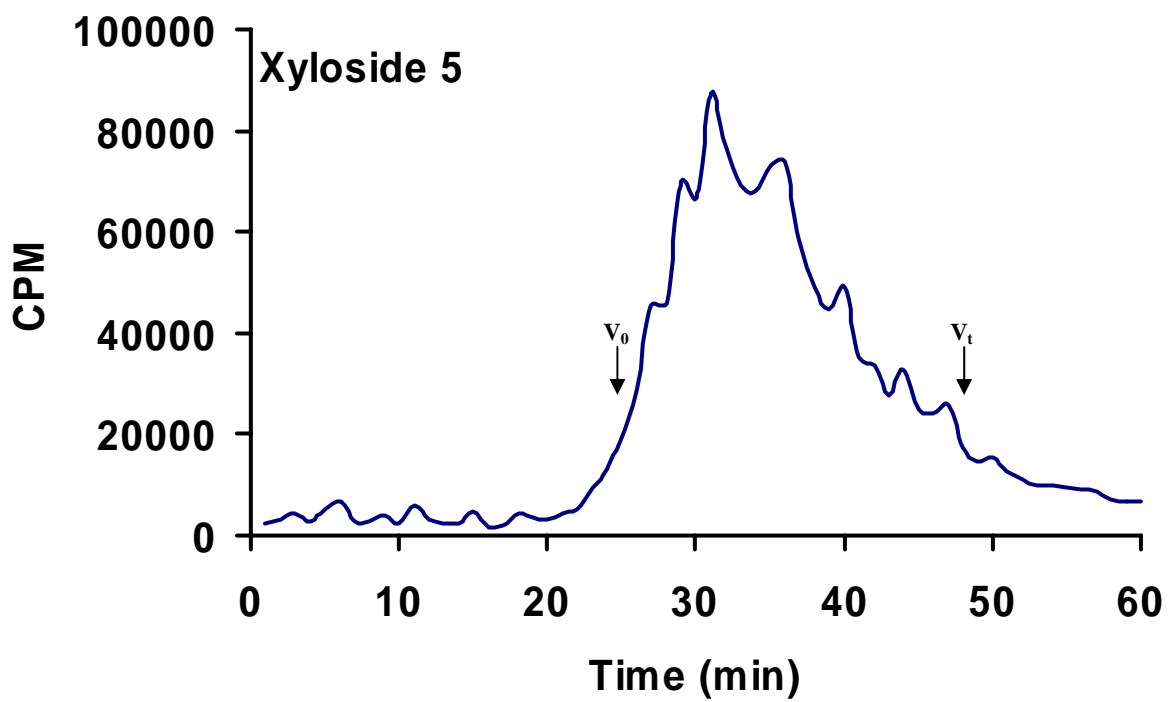

FIGURE S2A

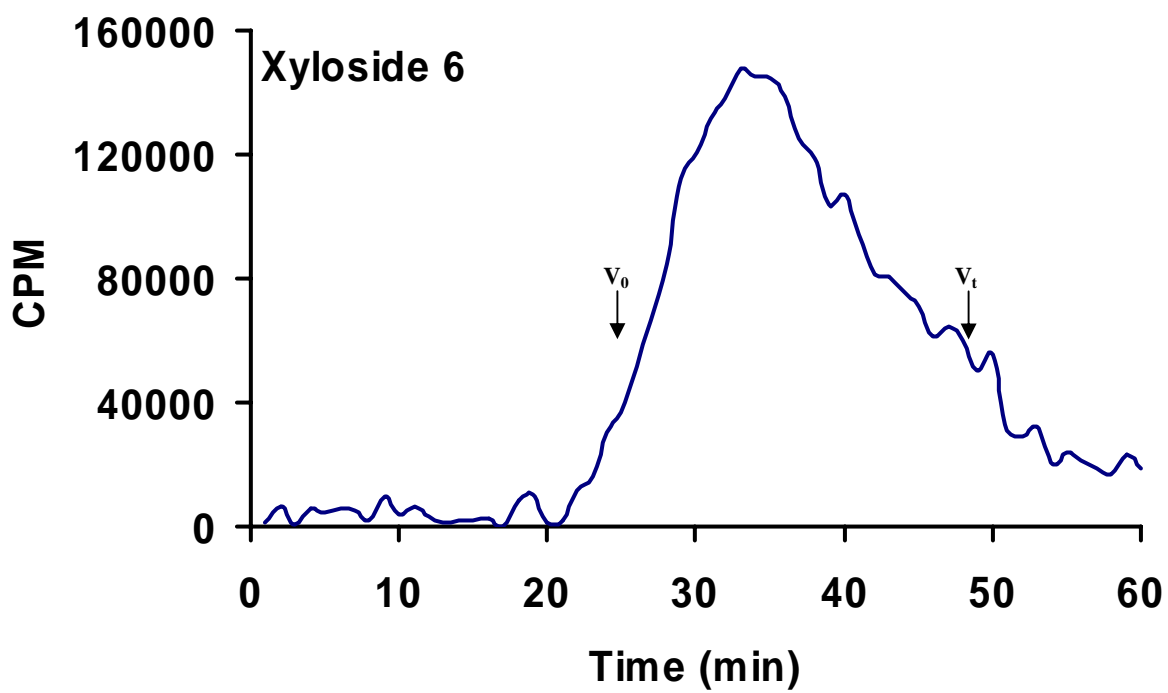

FIGURE S2B

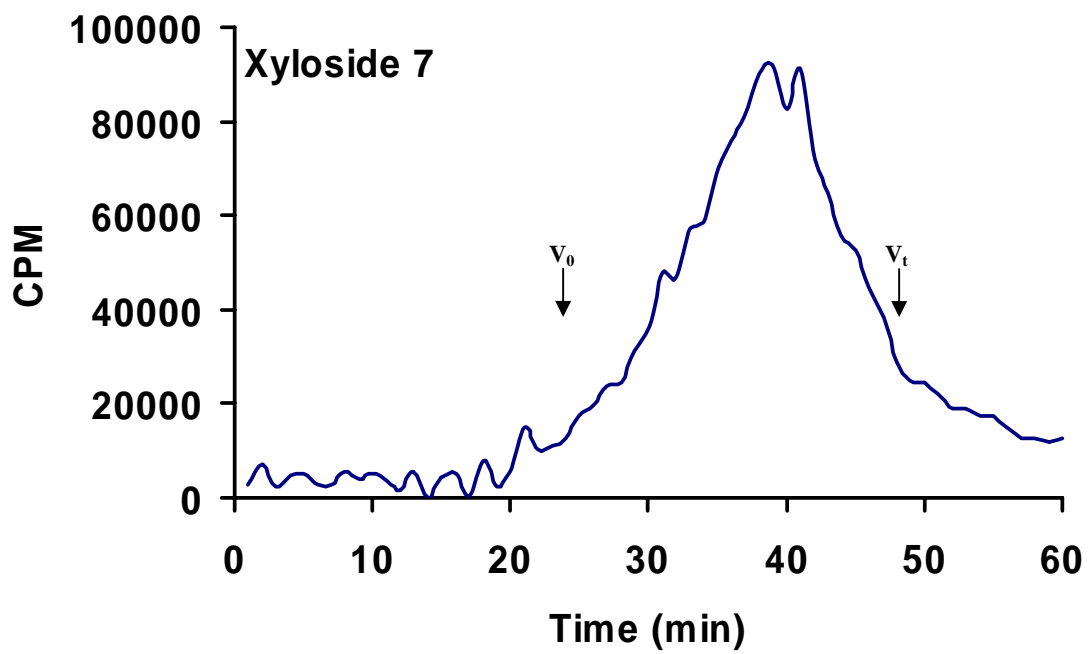

FIGURE S2C

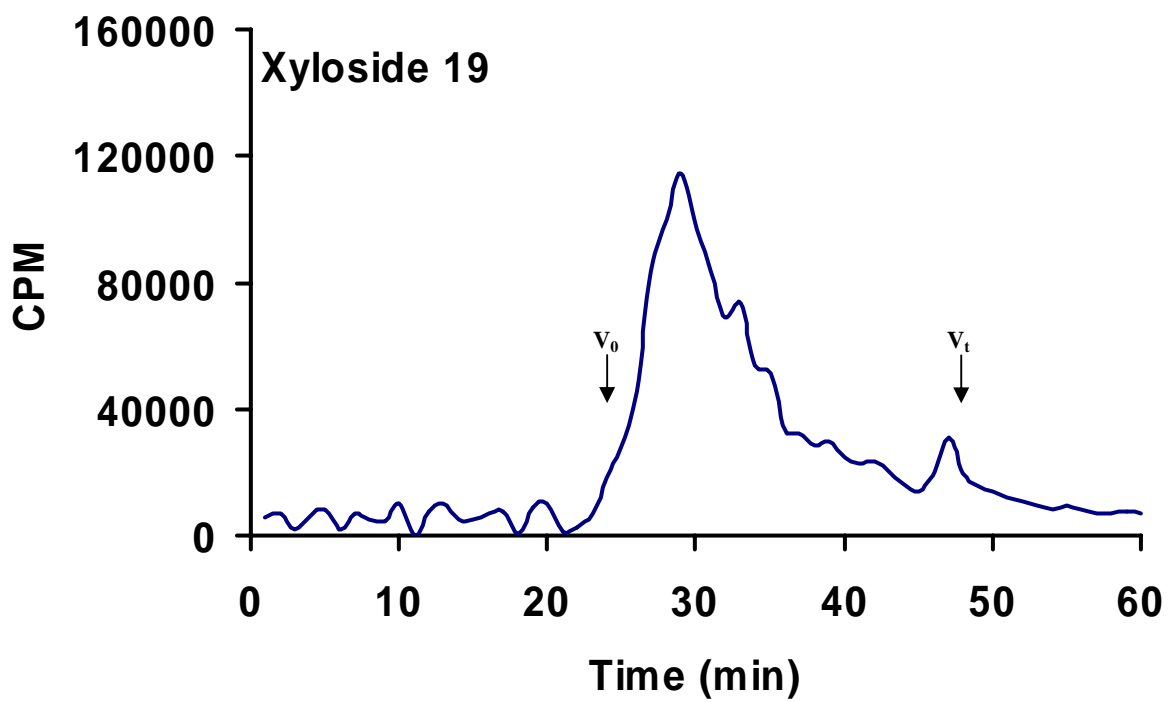

FIGURE S2D



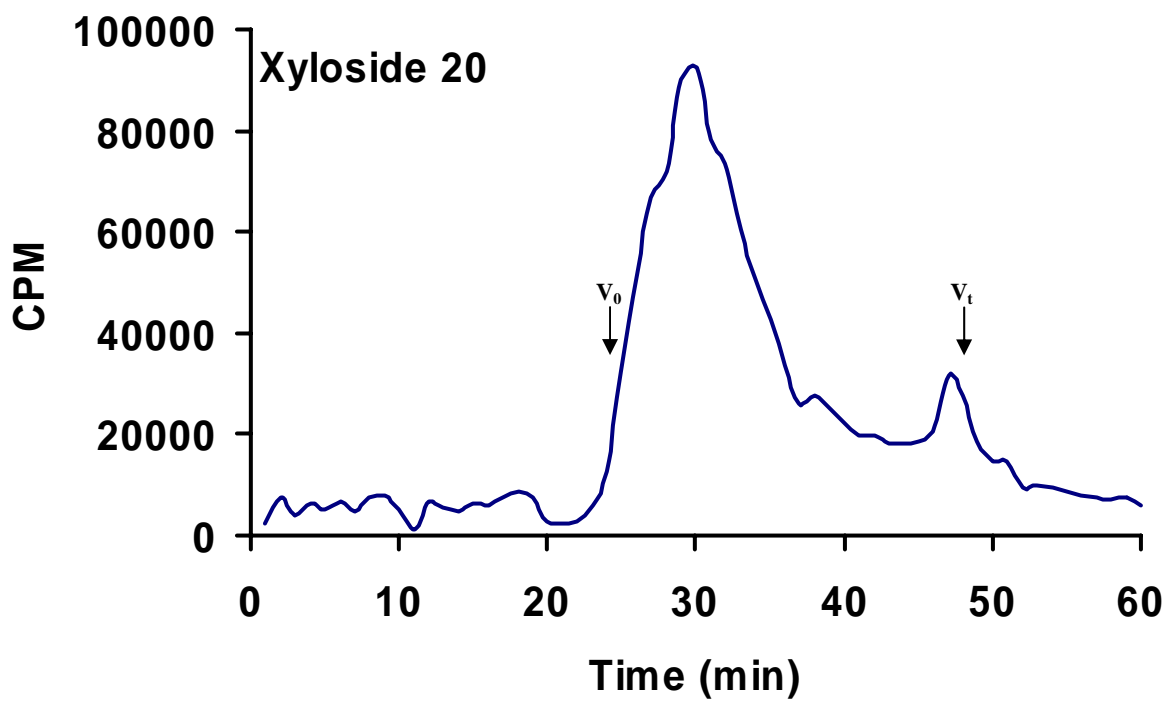

FIGURE S2E

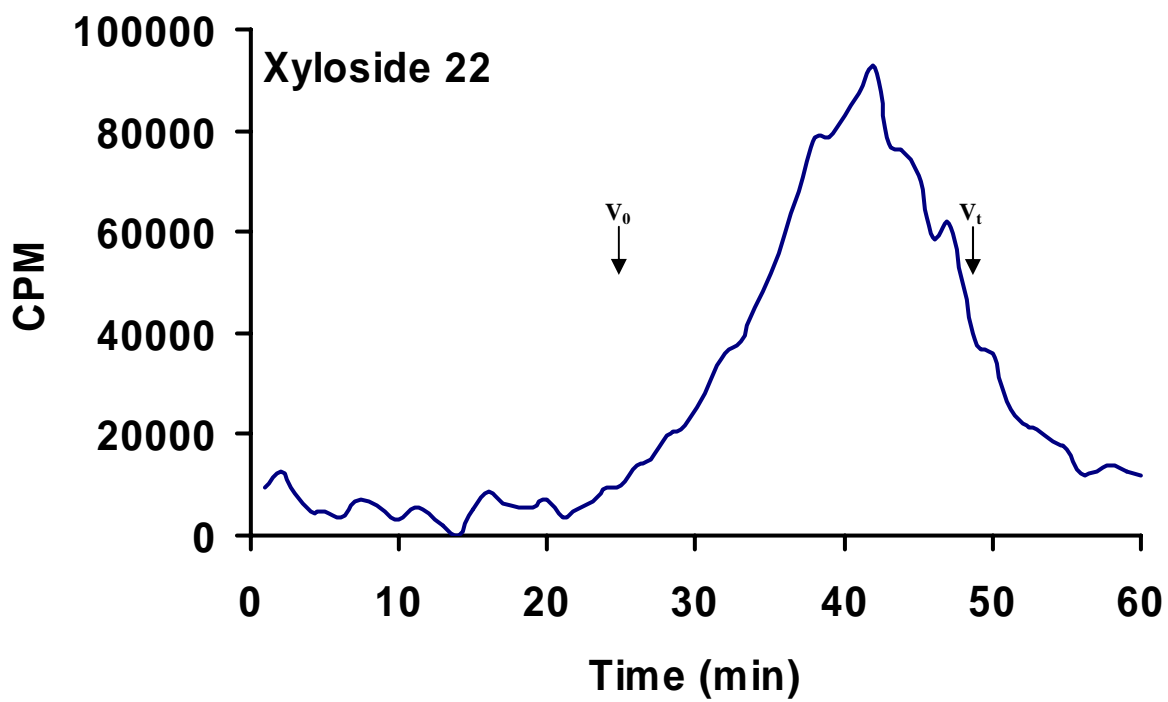

FIGURE S2F

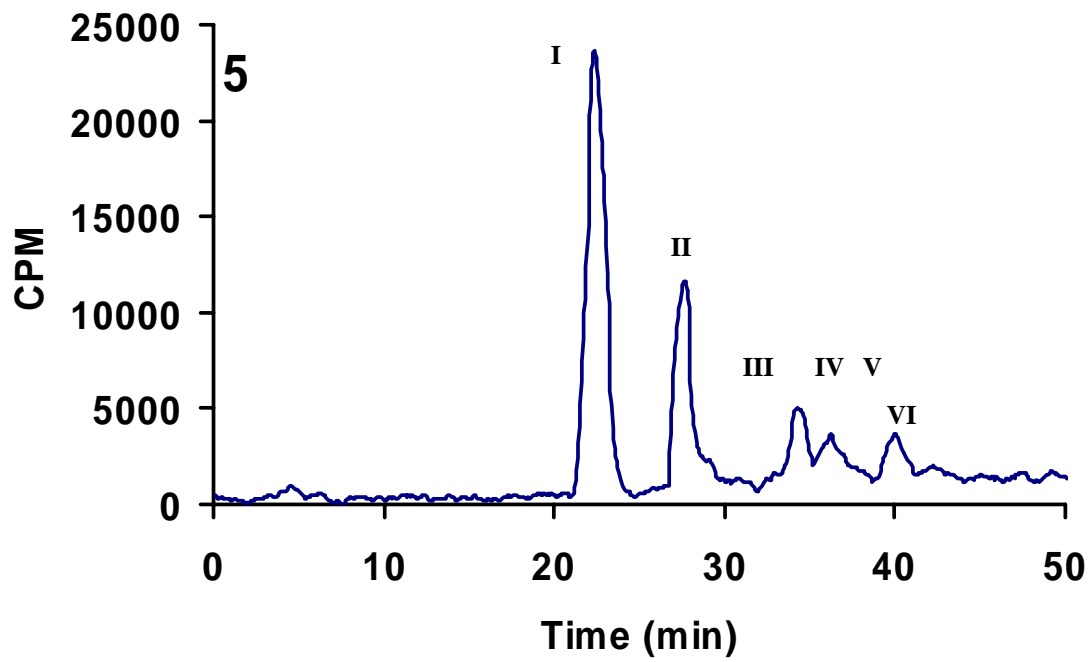

FIGURE S3A

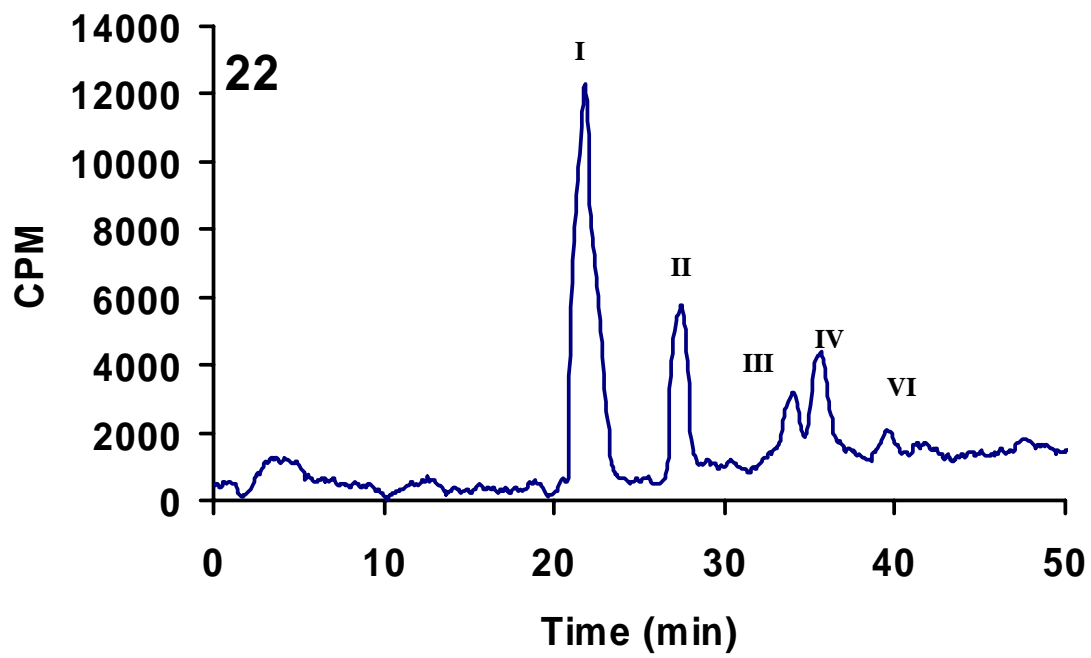

FIGURE S3B

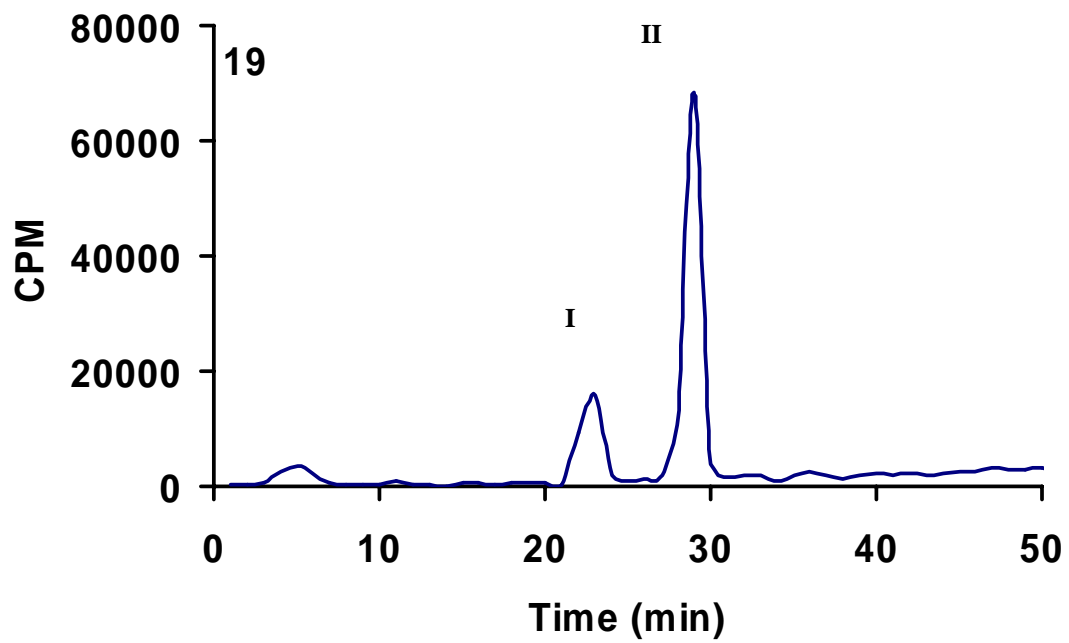

FIGURE S4A

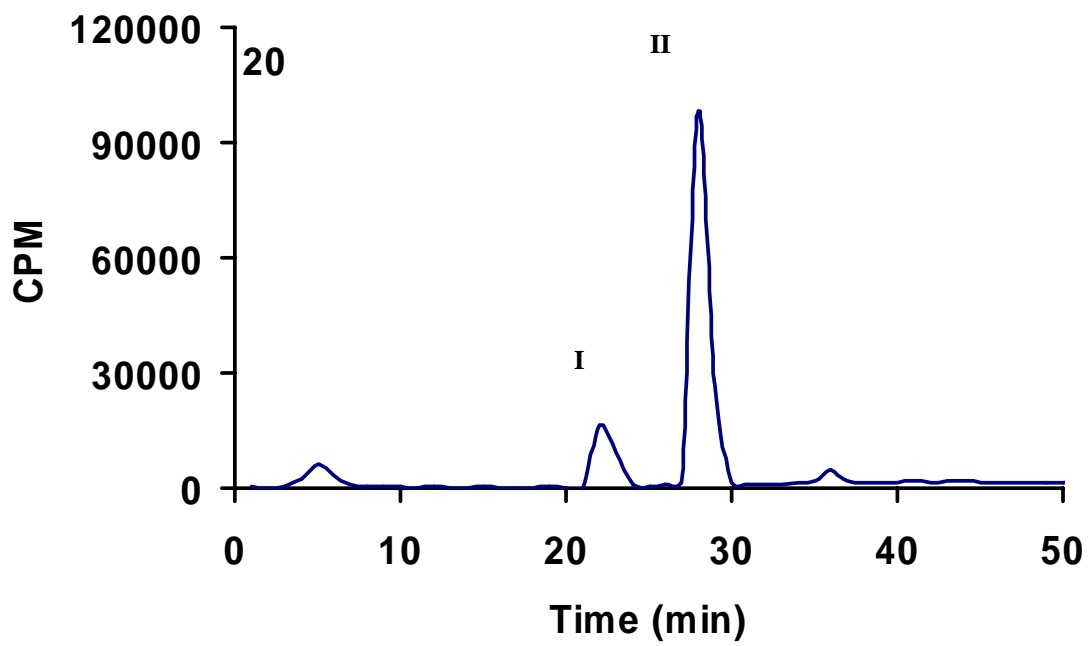

FIGURE S4B

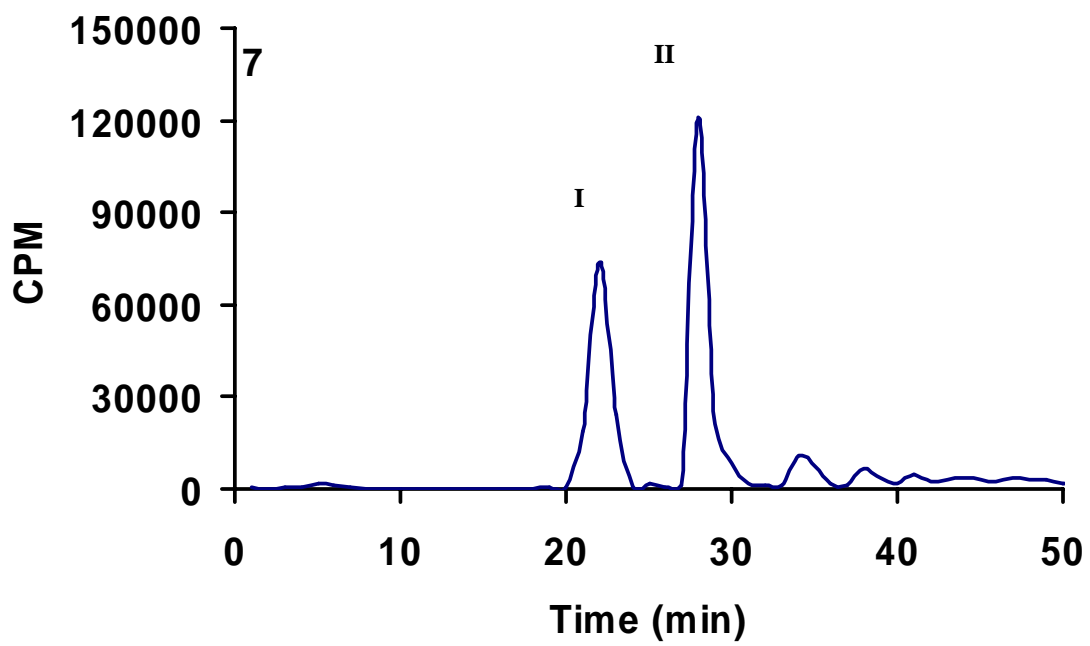

FIGURE S5A

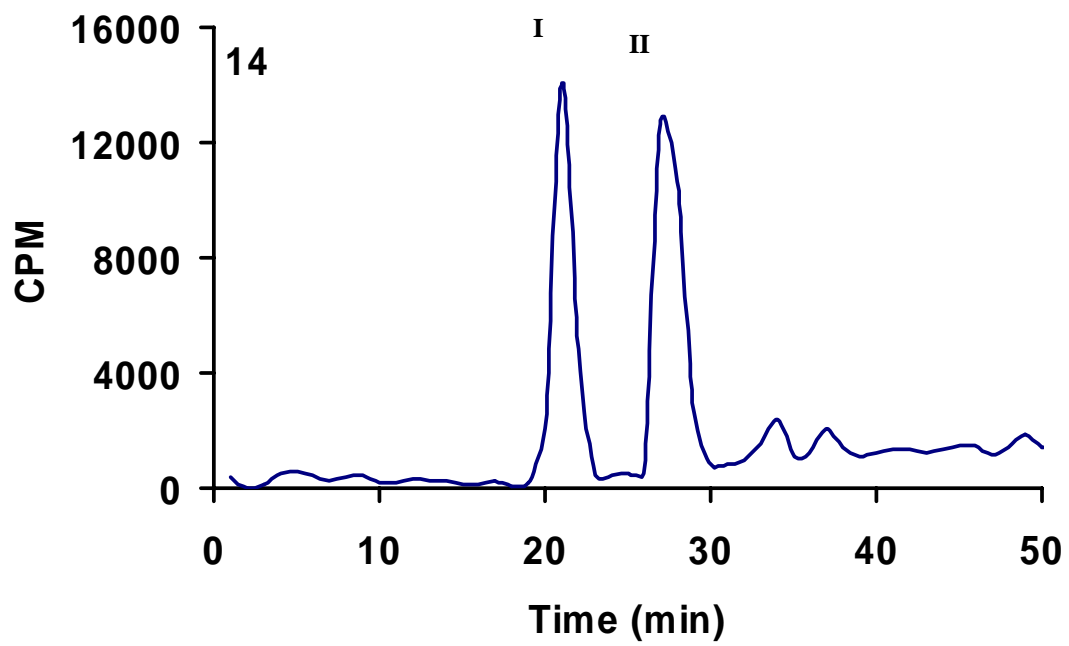

FIGURE S5B



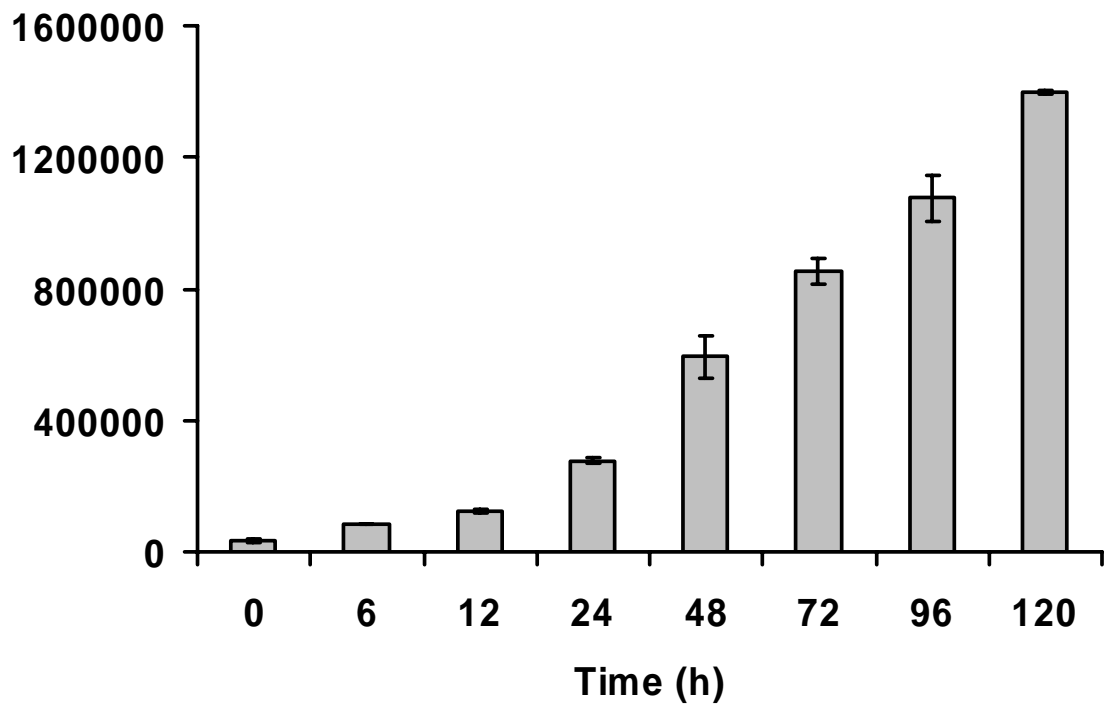

FIGURE S6
